# Supplementary material for: Phosphine-free synthesis of high quality ZnSe, ZnSe/ZnS, and Cu-, Mn-doped ZnSe nanocrystals
Source: Royal Society of Chemistry journal article supplement (doi:10.1039/b917674h), 2009-01-01
Supplement: b917674h.pdf [file b917674h.pdf]

## Supp. Mater.

# Controllable synthesis of high quality ZnSe, ZnSe/ZnS, and Cu-, Mn- doped ZnSe nanocrystals by phosphine-free method

*Huaibin Shen<sup>1,2</sup>, Hongzhe Wang<sup>1</sup>, Xiaomin Li<sup>1</sup>, Jin Zhong Niu<sup>1</sup>,*

*HuaWang<sup>1</sup>, Xia Chen<sup>2\*</sup> and Lin Song Li<sup>1\*</sup>*

<sup>1</sup>Key Laboratory for Special Functional Materials, Henan University,  
Kaifeng 475004, P. R. China;

<sup>2</sup>College of Life Science, Jilin University, Changchun 130021, P. R. China

---

\* To whom correspondence should be addressed. Fax: +86-378-3881358; Tel: +86-378-3881358; E-mail: lsli@henu.edu.cn, bbbbz@163.com.

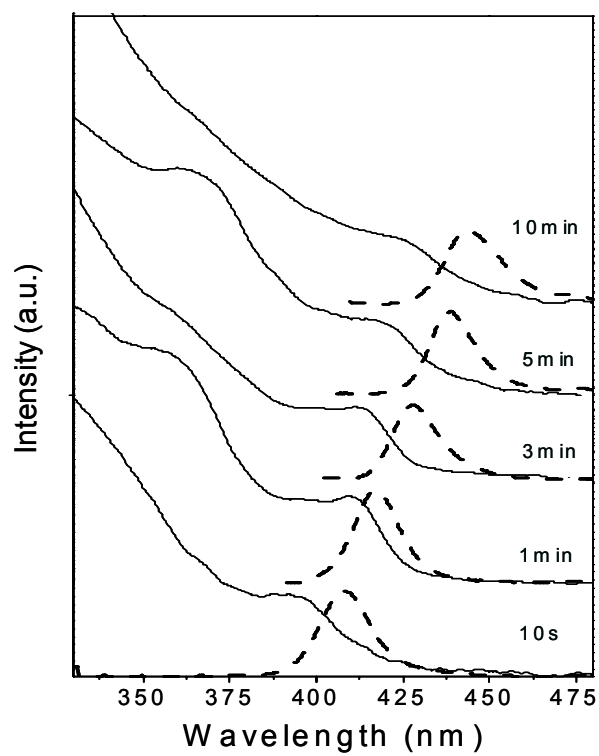

Fig. S1 Absorption and PL spectra of as-prepared ZnSe nanocrystals using selenium precursor injection method.

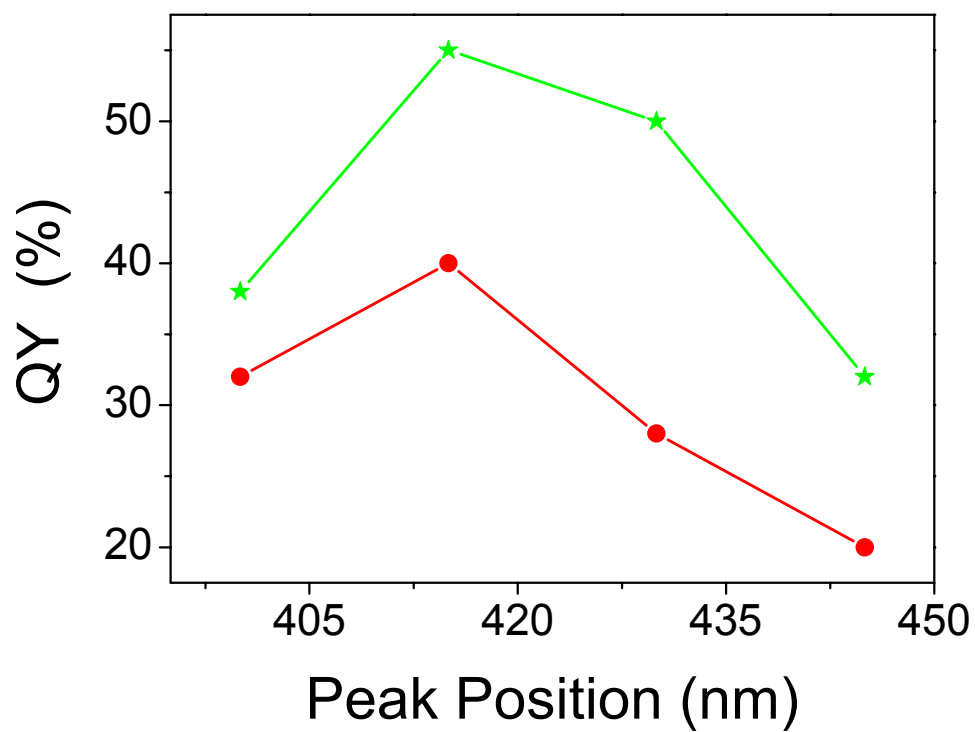

Fig. S2 Quantum yield changes vs peak position of ZnSe nanocrystals synthesized by selenium precursor injection (red) and zinc precursor injection at 310 °C (green).

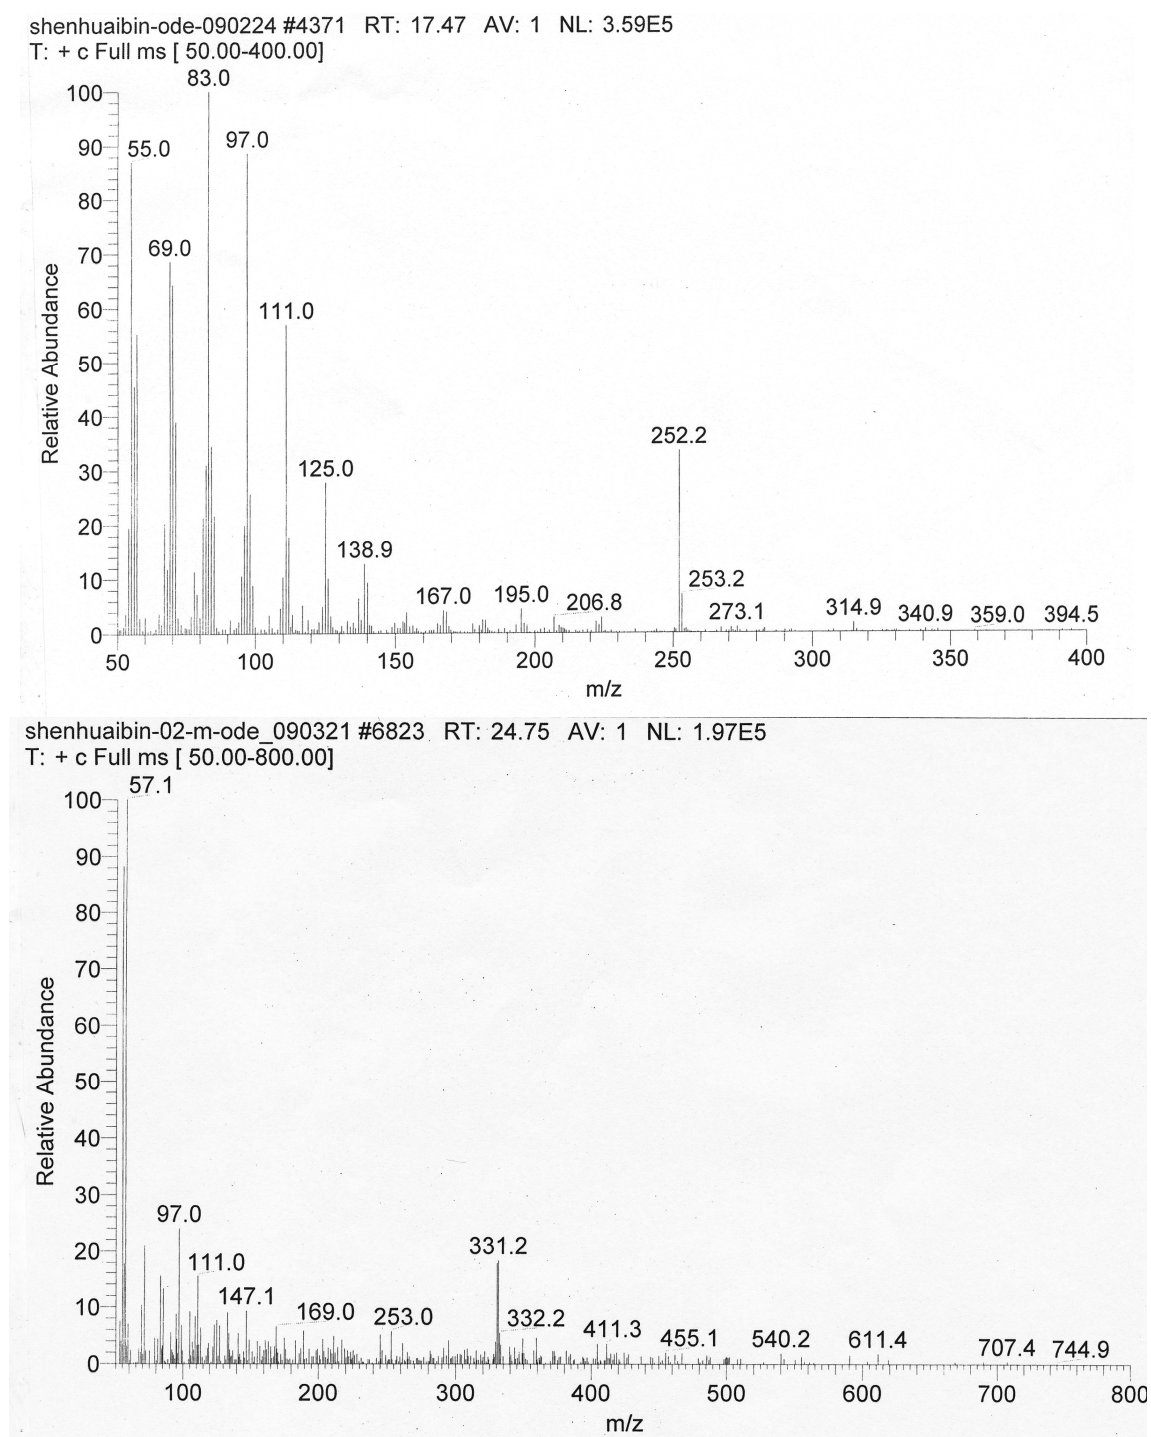

Fig. S3 Mass spectrum of pure ODE (top) and 0.2 M Se-ODE (bottom). The peak related to ODE ( $m/z$  252.2) was weaker in Se-ODE and shown a new peak at  $m/z$  331.2 corresponding to the combination between Se and ODE.

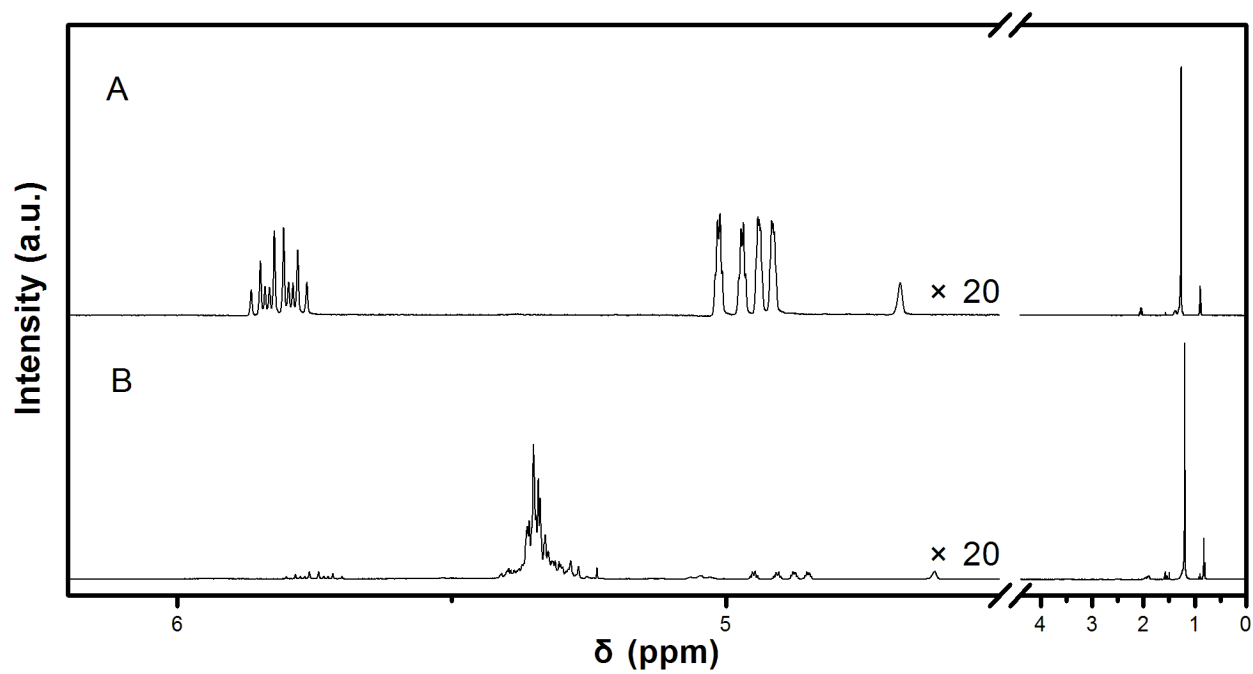

Fig. S4 <sup>1</sup>H NMR spectra of (A) ODE and (B) 0.2 M Se-ODE.

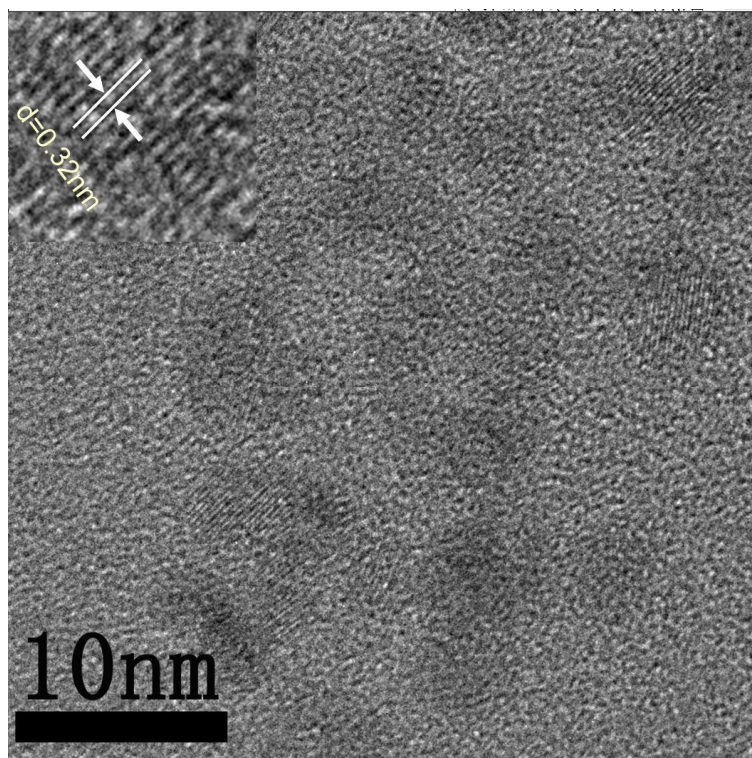

Fig. S5 HRTEM images of ZnSe nanocrystals (diameter  $\sim 5.0$  nm).

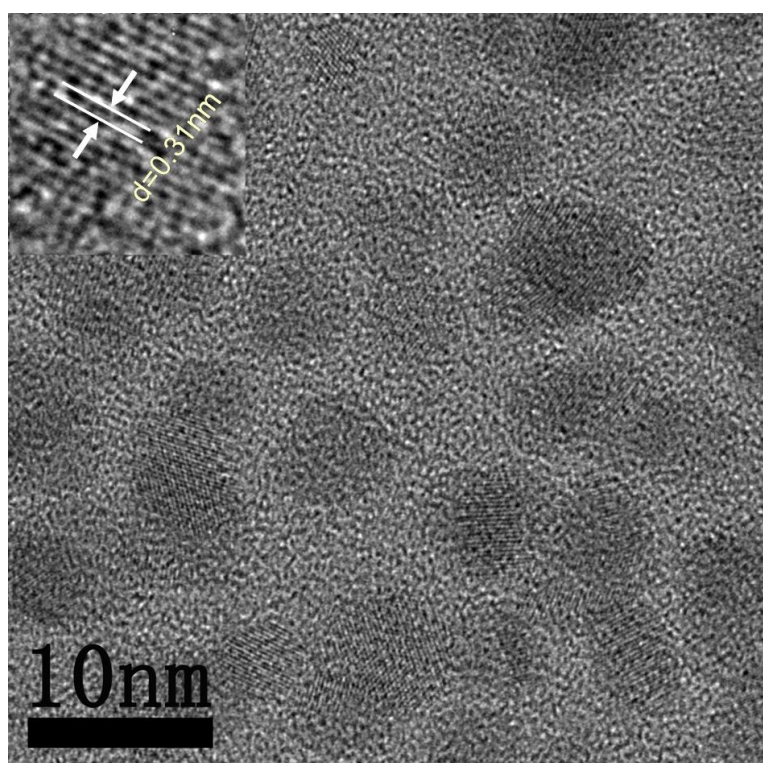

Fig. S6 HRTEM images of ZnSe/ZnS nanocrystals (diameter  $\sim 6.5$  nm).



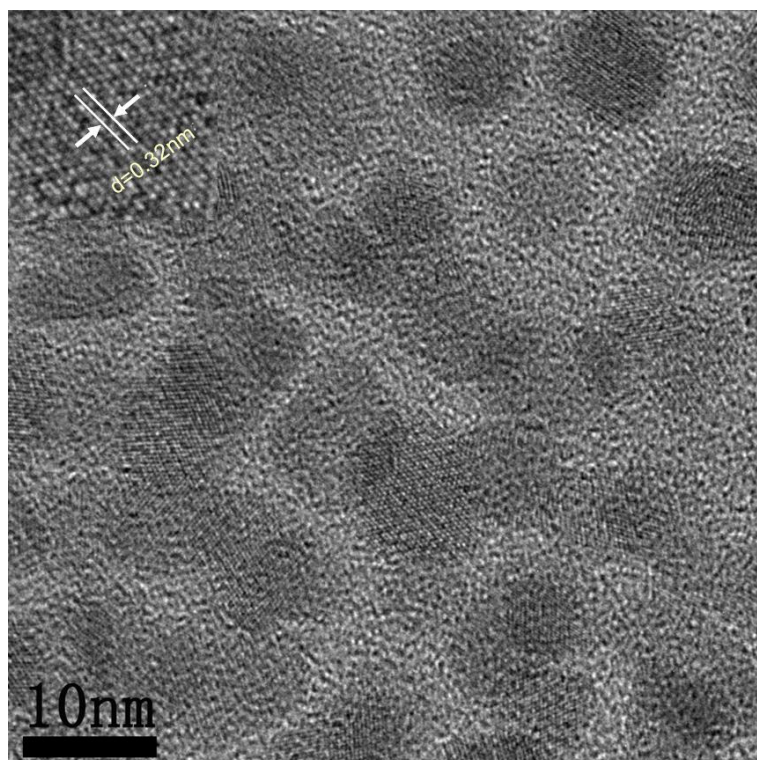

Fig. S7 HRTEM images of Cu doped ZnSe nanocrystals (diameter  $\sim 9.2$  nm).

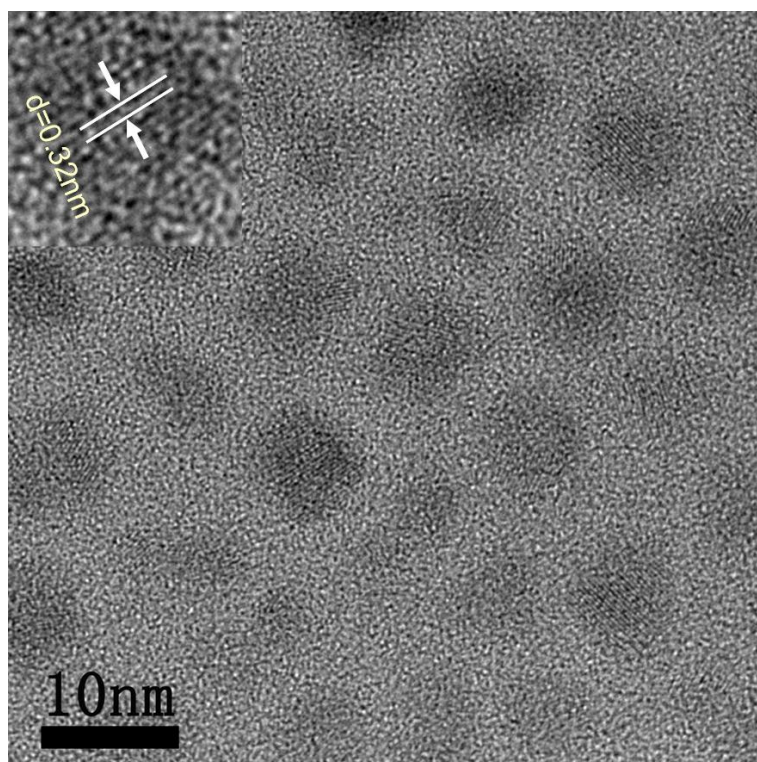

Fig. S8 HRTEM images of Mn doped ZnSe nanocrystals.
